# Supplementary material
Source: PubMed Central journal article supplement (PMC4372817)
Supplement: 10584_2012_570_MOESM5_ESM.pdf [file 10584_2012_570_MOESM5_ESM.pdf]

Table S1. Available models in the CMIP5 RCP8.5 ensemble archiving monthly surface air temperature (tas) and precipitation (pr) data for both the historical and 21<sup>st</sup> century periods. \*

| <b>Model</b>   | <b>Historical Realizations</b> | <b>RCP8.5 Realizations</b> | <b>RCP4.5 Realizations</b> |
|----------------|--------------------------------|----------------------------|----------------------------|
| ACCESS1-0      | 1                              | 1                          | 1                          |
| bcc-csm1-1     | 3                              | 1                          | 1                          |
| CanESM2        | 5                              | 5                          | 5                          |
| CCSM4          | 6                              | 6                          | 5                          |
| CNRM-CM5       | 10                             | 5                          | 1                          |
| CSIRO-Mk3-6-0  | 10                             | 10                         | 10                         |
| FGOALS-g2      | 4                              | 1                          | 1                          |
| GFDL-ESM2G     | 1                              | 1                          | 1                          |
| GFDL-ESM2M     | 1                              | 1                          | 1                          |
| GISS-E2-R      | 16                             | 1                          | 5                          |
| HadGEM2-CC     | 3                              | 3                          | 1                          |
| HadGEM2-ES     | 4                              | 1                          | 4                          |
| inmem4         | 1                              | 1                          | 1                          |
| IPSL-CM5A-LR   | 4                              | 4                          | 4                          |
| MIROC5         | 4                              | 3                          | 3                          |
| MIROC-ESM-CHEM | 1                              | 1                          | 1                          |
| MIROC-ESM      | 1                              | 1                          | 1                          |
| MPI-ESM-LR     | 3                              | 3                          | 3                          |
| MRI-CGCM3      | 5                              | 1                          | 1                          |
| NorESM1-M      | 3                              | 1                          | 1                          |

\* see Supplemental Information for description of approach to averaging across the ensemble
